# Supplementary material for: Characteristics of online medical care consultation for pregnant women during the COVID-19 outbreak: cross-sectional study
Source: PubMed Central journal article supplement — BMJ Open. 2020 Nov 17;10(11):e043461. doi: 10.1136/bmjopen-2020-043461 (PMC7674021; doi:10.1136/bmjopen-2020-043461), 2020-11-17
Supplement: bmjopen-2020-043461supp001.pdf [file bmjopen-2020-043461supp001.pdf]

Table S1: confirmed cases in the selected areas as at the time of data collection.

| <b>The severity of the epidemic situation</b> | <b>Representative areas</b> | <b>Confirmed cases (cases)</b> |
|-----------------------------------------------|-----------------------------|--------------------------------|
| Mild                                          | Gansu                       | 91                             |
|                                               | Xinjiang                    | 76                             |
| Moderate                                      | Chongqing                   | 575                            |
|                                               | Hubei                       | 64287                          |
| Severe                                        | Henan                       | 1271                           |
|                                               | Hunan                       | 1261                           |
