# Supplementary material for: Characteristics of online medical care consultation for pregnant women during the COVID-19 outbreak: cross-sectional study
Source: PubMed Central journal article supplement — BMJ Open. 2020 Nov 17;10(11):e043461. doi: 10.1136/bmjopen-2020-043461 (PMC7674021; doi:10.1136/bmjopen-2020-043461), 2020-11-17
Supplement: bmjopen-2020-043461supp002.pdf [file bmjopen-2020-043461supp002.pdf]

**Characteristics of online medical care consultation for pregnant women during the COVID-19 outbreak: a cross-sectional study**

Miaomiao Chen<sup>1,2,a</sup>, Xiyao Liu<sup>1,a</sup>, Jun Zhang<sup>3</sup>, Guoqiang Sun<sup>2</sup>, Ying Gao<sup>2</sup>, Yuan Shi<sup>4</sup>, Philip N. Baker<sup>5</sup>, Jing Zeng<sup>1</sup>, Yangxi Zheng<sup>1</sup>, Xin Luo<sup>1,\*</sup>, Hongbo Qi<sup>1,\*</sup>

<sup>1</sup> Department of Obstetrics, The First Affiliated Hospital of Chongqing Medical University, No. 1 Youyi Road, Yuzhong District, Chongqing 400016, China.

<sup>2</sup> Maternal and Child Health Hospital of Hubei Province, No. 745 Wuluo Road, Hongshan District, Wuhan City, Hubei Province, 430070, China.

<sup>3</sup> MOE-Shanghai Key Laboratory of Children's Environmental Health, Xin Hua Hospital Affiliated to Shanghai Jiao Tong University School of Medicine, Shanghai 200092, China.

<sup>4</sup> Department of Neonatology, Children's Hospital of Chongqing Medical University, Chongqing 400014, China.

<sup>5</sup> College of Life Sciences, University of Leicester, Leicester LE1 7RH, UK.

**<sup>a</sup> Authors contributed equally.**

**\* Correspondence to:**

Hongbo Qi (Address: Department of Obstetrics, The First Affiliated Hospital of Chongqing Medical University, No. 1 Youyi Road, Yuzhong District, Chongqing 400016, China. E-mail: qihongbocy@gmail.com. Telephone: +86 13808376116);

Xin Luo (Address: Department of Obstetrics, The First Affiliated Hospital of Chongqing Medical University, No. 1 Youyi Road, Yuzhong District, Chongqing 400016, China. E-mail: lxcqmu@outlook.com. Telephone: +86 15826109160).

**Appendix 1: Satisfaction questionnaire survey****Notice:**

1. This is the translated version (from Chinese to English) of the questionnaire.
2. This is merely the main content of the questionnaire, not covering the brief introduction, the tips for filling in and the acknowledgments.
3. Unless otherwise mentioned, the questions are single-choice questions with options below or blank-filling questions with a horizontal line.

**1. Is you first time using e-health ?**

- A: Yes
- B: No

**2. Had your online medical consultation been solved ?**

- A: Completely solved
- B: Largely solved
- C: Barely solved
- D: Not solved at all

**3. Are you satisfied with this online medical service?**

- A: Completely satisfaction
- B: Mostly satisfaction
- C: Neutral attitude
- D: Mostly dissatisfaction
- E: Completely dissatisfaction

**4. What convenience do you think e-health brings to you? (multiple choices)**

- A: Time -saving
- B: Reducing risk of being infected with COVID-19
- C: Cost- saving
- D: Feeling more relax

**5. What other functions do you hope e-health can provide for you? (multiple choices)**

- A: Online video
- B: Physician's replay within a defined time
- C: Automatic referral to appropriate obstetricians<sup>2</sup>
- D: Management of chronic diseases (diabetes, hypertension disorders, etc.)
- E: Others (remote fetal heart monitoring, electronic prescription, or online pharmacies)

**6. During the outbreak of COVID-19, which one do you prefer ?**

- A: E-health
- B: outpatient

**7. After the COVID-19, which one do you prefer ?**

- A: E-health
- B: outpatient
